# Supplementary material for: Relationship between Diet Quality and Socioeconomic and Health-Related Factors in Adolescents by Gender
Source: MDPI journal article supplement (doi:10.3390/nu16010139), 2023-12-30
Supplement: s1 [file s1]

**Supplementary Table S2: Distribution of frequencies of consumption of each food group according to Spanish Society of Community Nutrition dietary guidelines for boys and girls**

|                         | Percentage of reporting lower than recommended frequency of consumption |       | Percentage of girls reporting recommended frequency of consumption |       | Percentage of girls reporting higher than recommended frequency of consumption |       |
|-------------------------|-------------------------------------------------------------------------|-------|--------------------------------------------------------------------|-------|--------------------------------------------------------------------------------|-------|
|                         | Boys                                                                    | Girls | Boys                                                               | Girls | Boys                                                                           | Girls |
| Cereals                 | 81,6                                                                    | 88,0  | 16,6                                                               | 11,27 | 1,4                                                                            | 0,7   |
| Vegetables              | 91,2                                                                    | 88,2  | 8,8                                                                | 11,8  | 0,0                                                                            | 0,0   |
| Fruit                   | 78,1                                                                    | 74,8  | 21,9                                                               | 25,25 | 0,0                                                                            | 0,0   |
| Milk and dairy products | 70,6                                                                    | 74,8  | 29,4                                                               | 25,25 | 0,0                                                                            | 0,0   |
| Nuts                    | 50,6                                                                    | 58,0  | 43,9                                                               | 37,91 | 5,5                                                                            | 4,1   |
| Legumes                 | 38,1                                                                    | 39,6  | 60,0                                                               | 59,26 | 1,9                                                                            | 1,1   |
| Meat                    | 8,2                                                                     | 15,4  | 24,7                                                               | 30,86 | 67,2                                                                           | 53,6  |
| Fish                    | 47,5                                                                    | 47,3  | 32,4                                                               | 33,85 | 20,1                                                                           | 18,9  |
| Eggs                    | 41,0                                                                    | 48,1  | 35,0                                                               | 34,66 | 24,0                                                                           | 17,3  |
| Processed meats         | 0,0                                                                     | 0,0   | 11,3                                                               | 16,02 | 88,7                                                                           | 84,0  |
| Soft drinks             | 0,0                                                                     | 0,0   | 28,1                                                               | 47,64 | 72,0                                                                           | 52,4  |
| Energy drinks           | 0,0                                                                     | 0,0   | 70,8                                                               | 87,15 | 29,2                                                                           | 12,9  |
| Sweets                  | 0,0                                                                     | 0,0   | 51,7                                                               | 49,29 | 48,3                                                                           | 50,7  |
| Pastries                | 0,0                                                                     | 0,0   | 28,1                                                               | 32,83 | 71,9                                                                           | 67,2  |
| Snacks                  | 0,0                                                                     | 0,0   | 29,9                                                               | 35,06 | 70,1                                                                           | 64,9  |
| Fast food               | 0,0                                                                     | 0,0   | 46,1                                                               | 55,56 | 53,9                                                                           | 44,4  |
