# Supplementary material for: Relationship between Diet Quality and Socioeconomic and Health-Related Factors in Adolescents by Gender
Source: MDPI journal article supplement (doi:10.3390/nu16010139), 2023-12-30
Supplement: s1 [file s1]

**Supplementary Table S1**

| Criteria to define the score of each variable in the S-Healthy Eating Index |                                                                                                        |                                      |                        |                                      |                                     |
|-----------------------------------------------------------------------------|--------------------------------------------------------------------------------------------------------|--------------------------------------|------------------------|--------------------------------------|-------------------------------------|
| Variables                                                                   | Criteria for maximum score of 10                                                                       | Criteria for scoring 7.5             | Criteria for scoring 5 | Criteria for scoring 2.5             | Criteria for the minimum score of 0 |
| <i>Daily consumption</i>                                                    |                                                                                                        |                                      |                        |                                      |                                     |
| 1.Cereals and cereal products                                               | Daily consumption                                                                                      | 3 or more times a week but not daily | 1 or 2 times a week    | Less than once a week                | Never or almost never               |
| 2.Vegetables                                                                | Daily consumption                                                                                      | 3 or more times a week but not daily | 1 or 2 times a week    | Less than once a week                | Never or almost never               |
| 3.Fruits                                                                    | Daily consumption                                                                                      | 3 or more times a week but not daily | 1 or 2 times a week    | Less than once a week                | Never or almost never               |
| 4.Milk and dairy products                                                   | Daily consumption                                                                                      | 3 or more times a week but not daily | 1 or 2 times a week    | Less than once a week                | Never or almost never               |
| <i>Weekly consumption</i>                                                   |                                                                                                        |                                      |                        |                                      |                                     |
| 5.Meat                                                                      | 1 or 2 times a week                                                                                    | 3 or more times a week but not daily | Less than once a week  | Daily consumption                    | Never or almost never               |
| 6.Legumes                                                                   | 1 or 2 times a week                                                                                    | 3 or more times a week but not daily | Less than once a week  | Daily consumption                    | Never or almost never               |
| <i>Occasional consumption</i>                                               |                                                                                                        |                                      |                        |                                      |                                     |
| 7.Processed meats                                                           | Never or almost never                                                                                  | Less than once a week                | 1 or 2 times a week    | 3 or more times a week but not daily | Daily consumption                   |
| 8.Sweets                                                                    | Never or almost never                                                                                  | Less than once a week                | 1 or 2 times a week    | 3 or more times a week but not daily | Daily consumption                   |
| 9.Soft drinks                                                               | Never or almost never                                                                                  | Less than once a week                | 1 or 2 times a week    | 3 or more times a week but not daily | Daily consumption                   |
| 10.Variety                                                                  | 2 points if meet each of the daily recommendations, 1 point if meet each of the weekly recommendations |                                      |                        |                                      |                                     |

Source Norte-Navarro et al., 2011 [1]

1. Norte-Navarro, A.; Ortiz-Moncada, R. Calidad de la dieta española según el índice de alimentación saludable. *Nutr Hosp* **2011**, 330–336, doi:10.3305/nh.2011.26.2.4630.
