# Supplementary material for: Relationship between Diet Quality and Socioeconomic and Health-Related Factors in Adolescents by Gender
Source: MDPI journal article supplement (doi:10.3390/nu16010139), 2023-12-30
Supplement: s1 [file s1]

Supplementary Table S3: Sensitivity analysis using quantile regression models

|                                            | Boys S-HEI (n = 3505) |              |                  | Girls S-HEI (n = 3814) |              |                  |
|--------------------------------------------|-----------------------|--------------|------------------|------------------------|--------------|------------------|
|                                            | Adjusted Coef.        | 95% CI       | p                | Adjusted Coef.         | 95% CI       | p                |
| <b>Course</b>                              |                       |              |                  |                        |              |                  |
| 2nd course of CSE                          | 0                     |              |                  | 0                      |              |                  |
| 4th course of CSE                          | -1.5                  | (-2.4; -0.6) | <b>0.001</b>     | 0.1                    | (-0.8; 1.0)  | 0.87             |
| 2nd course of PCSE                         | 1                     | (-0.2; 2.2)  | 0.096            | 2.3                    | (1.3; 3.4)   | <b>&lt;0.001</b> |
| ILTC                                       | -3.5                  | (-5.2; -1.8) | <b>&lt;0.001</b> | -3.5                   | (-5.3; -1.6) | <b>&lt;0.001</b> |
| <b>Parents' highest level of education</b> |                       |              |                  |                        |              |                  |
| University education                       | 0                     |              |                  | 0                      |              |                  |
| Secondary education                        | -2.0                  | (-3.0; -1.0) | <b>&lt;0.001</b> | -2.1                   | (-3.0; -1.2) | <b>&lt;0.001</b> |
| Primary education                          | -2.5                  | (-3.7; -1.3) | <b>&lt;0.001</b> | -3.8                   | (-4.9; -2.7) | <b>&lt;0.001</b> |
| No data                                    | -3.5                  | (-4.6; -2.4) | <b>&lt;0.001</b> | -3.1                   | (-4.2; -1.9) | <b>&lt;0.001</b> |
| <b>Physical activity <sup>a</sup></b>      |                       |              |                  |                        |              |                  |
| Compliance with WHO recommendations        | 0                     |              |                  | 0                      |              |                  |
| Under WHO recommendations                  | -0.5                  | (-1.3; -0.3) | 0.238            | -1.0                   | (-1.8; -0.2) | <b>0.019</b>     |
| No data                                    | -2.0                  | (-3.6; -0.4) | <b>&lt;0.001</b> | -3.5                   | (-5.0; -1.1) | <b>&lt;0.001</b> |
| <b>Alcohol use <sup>b</sup></b>            |                       |              |                  |                        |              |                  |
| Non-hazardous drinking                     | 0                     |              |                  | 0                      |              |                  |
| Hazardous drinking                         | -2.5                  | (-3.9; -1.1) | <b>&lt;0.001</b> | -0.6                   | (-1.7; 0.5)  | 0.31             |
| <b>Tobacco use</b>                         |                       |              |                  |                        |              |                  |
| Others                                     | 0                     |              |                  | 0                      |              |                  |
| Daily use                                  | -2.5                  | (-4.2; -0.8) | <b>0.003</b>     | -3.0                   | (-4.4; -1.5) | <b>&lt;0.001</b> |
| <b>Mobile use <sup>c</sup></b>             |                       |              |                  |                        |              |                  |
| No problematic use                         | 0                     |              |                  | 0                      |              |                  |
| Occasional or frequent problems            | -2.0                  | (-3.2; -0.8) | <b>0.001</b>     | -1.5                   | (-2.6; -0.3) | <b>0.011</b>     |
| No data                                    | -1.0                  | (-2.0; -0.0) | <b>0.05</b>      | -0.6                   | (-1.6; 0.5)  | 0.28             |
| <b>Self-perceived health</b>               |                       |              |                  |                        |              |                  |
| Excellent/very good                        | 0                     |              |                  | 0                      |              |                  |
| Good                                       | -1.5                  | (-2.4; -0.6) | <b>0.001</b>     | -1.5                   | (-2.3; -0.7) | <b>&lt;0.001</b> |
| Very poor/poor                             | -0.5                  | (-2.1; 1.1)  | 0.53             | -3.6                   | (-4.9; -2.4) | <b>&lt;0.001</b> |
| <b>Mood state <sup>d</sup></b>             |                       |              |                  |                        |              |                  |
| Good mood                                  |                       |              |                  | 0                      |              |                  |
| Low mood                                   |                       |              |                  | -1.3                   | (-2.1; -0.4) | <b>0.006</b>     |
| <b>Academic performance</b>                |                       |              |                  |                        |              |                  |
| Good grades                                | 0                     |              |                  | 0                      |              |                  |
| Average grades                             | -1.5                  | (-2.4; -0.6) | <b>0.001</b>     | -2.0                   | (-2.8; -1.1) | <b>&lt;0.001</b> |
| Poor grades                                | -4.0                  | (-5.4; -2.6) | <b>&lt;0.001</b> | -5.6                   | (-7.1; -4.0) | <b>&lt;0.001</b> |
| No data                                    | -3.5                  | (-5.4; -1.6) | <b>&lt;0.001</b> | -3.0                   | (-4.9; -1.1) | <b>0.002</b>     |

Statistically significant associations are highlighted in bold in the p-value columns. Abbreviations: 2nd and 4th course of CSE (Compulsory Secondary Education) corresponds to ISCED 2 (International Standard Classification of Education); 2nd PCSE (Post Compulsory Secondary Education) and ILTC (Intermediate Level Training Cycles) corresponds to ISCED3 (International Standard Classification of Education); WHO = World Health Organization; S-HEI = Healthy Eating Index Spanish adaptation; CI = Confidence Interval; "p" Student's *t* test,  $p < 0.05$  were considered statistically significant. <sup>a</sup> In compliance with the WHO recommendation of  $\geq 60$  min per day, or under the WHO recommendation of 60 min per day, estimated from the average daily minutes of moderate or vigorous physical activity reported by the adolescents. <sup>b</sup> Scores above 3 on the Alcohol Use Disorders Identification Test (AUDIT-C test) were considered hazardous drinking. <sup>c</sup> Scores above 15 on the Questionnaire for mobile phone-related experiences (CERM test) were considered problematic mobile use. <sup>d</sup> Scores of 3 or more was identified as a low mood.
